# Supplementary material
Source: PubMed Central journal article supplement (PMC10644243)
Supplement: jamacardiol-e234776-s001.pdf [file jamacardiol-e234776-s001.pdf]

## Supplementary Online Content

Krim SR, Anand S, Greene SJ, et al. Torsemide vs furosemide among patients with new-onset vs worsening chronic heart failure: a substudy of the TRANSFORM-HF randomized clinical trial. *JAMA Cardiol*. Published online November 13, 2023. doi:10.1001/jamacardio.2023.4776

**eTable 1.** Baseline Characteristics of Study Participants (Demographics, Laboratory, and Vital Signs, Heart Failure Characteristics, and Medical History) by HF Type, for Patients With  $\leq 40\%$  EF

**eTable 2.** Baseline Characteristics of Study Participants (Demographics, Laboratory, and Vital Signs, Heart Failure Characteristics, and Medical History) by HF Type, for Patients With  $>40\%$  EF

**eTable 3.** Time-to-Event Outcome Comparison Between De Novo and WHF for Overall Patients and Stratified by Ejection Fraction

**eTable 4.** Effect of HF Type on Total Rehospitalizations Through Month 12 for Overall Patients and stratified by ejection fraction

**eTable 5.** Comparison of KCCQ Clinical Summary Score by HF Type for overall patients and by EF Levels—Least Square Mean by Visit

**eTable 6.** Treatment Effect on Total Rehospitalizations Through Month 12 by HF Type for Overall Patients and Stratified by EF Levels

**eTable 7.** Comparison of KCCQ Clinical Summary Score Between Treatment Diuretics Groups by HF Types—Least Square Mean by Visit for Overall Patients and Stratified by EF Levels

**eTable 8.** Diuretic Dose Adherence at Discharge, Month 1, 6, and 12 by Heart Failure Type and Diuretic Treatment

**eFigure 1.** Unadjusted Kaplan-Meier curves for time to all-cause mortality comparing De novo and worsening HF for overall patients over 12 months

**eFigure 2.** Unadjusted Kaplan-Meier Curves for Time to All-Cause Mortality Comparing De Novo and WHF for Patients With EF Level  $\leq 40\%$  Over 12 Months

**eFigure 3.** Unadjusted Kaplan-Meier Curves for Time to All-Cause Mortality Comparing De Novo and WHF for Patients With EF Level  $>40\%$  Over 12 Months

**eFigure 4.** Unadjusted Cumulative Incidence Curves for All-Cause Hospitalization Over 12 Months Comparing De Novo and WHF for Overall Patients

**eFigure 5.** Unadjusted Cumulative Incidence Curves for All-Cause Hospitalization Over 12 Months Comparing De Novo and WHF for Patients With EF Level  $\leq 40\%$

**eFigure 6.** Unadjusted Cumulative Incidence Curves for All-Cause Hospitalization Over 12 Months Comparing De Novo and WHF for Patients With EF Level  $>40\%$

**eFigure 7.** Forest Plot of HR/RR Comparing Randomized Diuretic Treatments (Torsemide vs Furosemide) for Overall Patients and Patients for All End Points Among Patient With EF Level  $\leq 40\%$

**eFigure 8.** Forest Plot of HR/RR Comparing Randomized Diuretic Treatments (Torsemide vs Furosemide) for Overall Patients and Patients for All End Points Among Patient With EF Level  $> 40\%$

This supplementary material has been provided by the authors to give readers additional information about their work.

eTable 1. Baseline characteristics of study participants (Demographics, Laboratory, and Vital Signs, Heart Failure Characteristics and Medical History) by HF type, for patients with ≤40% EF

|                                                                  | All Patients<br>N=1,835 | De novo<br>N=558        | WHF<br>N=1,277           | P-value |
|------------------------------------------------------------------|-------------------------|-------------------------|--------------------------|---------|
| <b>Demographics</b>                                              |                         |                         |                          |         |
| Age, years                                                       |                         |                         |                          | <.001   |
| N                                                                | 1835                    | 558                     | 1277                     |         |
| Mean (SD)                                                        | 61.7 (13.8)             | 57.7 (13.7)             | 63.5 (13.4)              |         |
| Median (25 <sup>th</sup> , 75 <sup>th</sup> )                    | 63.0 (53, 72)           | 58.0 (50, 67)           | 65.0 (56, 73)            |         |
| Female sex                                                       | 567 (30.9%)             | 187 (33.5%)             | 380 (29.8%)              | 0.11    |
| Race                                                             |                         |                         |                          | <.001   |
| American Indian or Alaska Native                                 | 10 (0.5%)               | 3 (0.5%)                | 7 (0.5%)                 |         |
| Asian                                                            | 47 (2.6%)               | 23 (4.1%)               | 24 (1.9%)                |         |
| Black or African American                                        | 667 (36.4%)             | 163 (29.3%)             | 504 (39.5%)              |         |
| Native Hawaiian or Other Pacific Islander                        | 19 (1.0%)               | 6 (1.1%)                | 13 (1.0%)                |         |
| White                                                            | 998 (54.5%)             | 324 (58.2%)             | 674 (52.9%)              |         |
| Other                                                            | 67 (3.7%)               | 31 (5.6%)               | 36 (2.8%)                |         |
| Multiple                                                         | 24 (1.3%)               | 7 (1.3%)                | 17 (1.3%)                |         |
| Hispanic or Latino                                               | 104 (5.7%)              | 34 (6.1%)               | 70 (5.5%)                | 0.59    |
| <b>Laboratory values</b>                                         |                         |                         |                          |         |
| Sodium, mEq/L                                                    |                         |                         |                          | 0.58    |
| Mean (SD)                                                        | 137.5 (3.6)             | 137.6 (3.5)             | 137.4 (3.6)              |         |
| Potassium, mEq/L                                                 |                         |                         |                          | 0.07    |
| Mean (SD)                                                        | 4.05 (0.45)             | 4.02 (0.44)             | 4.06 (0.45)              |         |
| Blood urea nitrogen, mg/dL                                       |                         |                         |                          | <.001   |
| Mean (SD)                                                        | 31.3 (37.0)             | 29.7 (53.6)             | 32.0 (26.7)              |         |
| Creatinine, mg/dL                                                |                         |                         |                          | <.001   |
| Mean (SD)                                                        | 1.379 (0.596)           | 1.232 (0.576)           | 1.443 (0.594)            |         |
| Estimated Glomerular filtration rate, mL/min/1.73 m <sup>2</sup> |                         |                         |                          | <.001   |
| Mean (SD)                                                        | 62.6 (24.4)             | 71.2 (24.1)             | 58.9 (23.6)              |         |
| N-Terminal pro B-type natriuretic peptide, pg/mL                 |                         |                         |                          | 0.004   |
| N                                                                | 871                     | 264                     | 607                      |         |
| Median (25 <sup>th</sup> , 75 <sup>th</sup> )                    | 4554.0 (2368.0, 9620.0) | 4015.5 (2179.0, 8257.5) | 4921.0 (2451.0, 10290.0) |         |
| B-type natriuretic peptide (BNP), pg/mL                          |                         |                         |                          | 0.004   |

|                                                        | All Patients<br>N=1,835   | De novo<br>N=558          | WHF<br>N=1,277            | P-value |
|--------------------------------------------------------|---------------------------|---------------------------|---------------------------|---------|
| N                                                      | 860                       | 259                       | 601                       |         |
| Median (25 <sup>th</sup> , 75 <sup>th</sup> )          | 1265.0<br>(643.7, 2258.5) | 1111.3<br>(607.0, 1850.0) | 1345.0<br>(665.0, 2384.0) |         |
| Hemoglobin, g/L                                        |                           |                           |                           | <.001   |
| Mean (SD)                                              | 12.50 (3.71)              | 13.06 (2.39)              | 12.26 (4.14)              |         |
| <b>Vital signs</b>                                     |                           |                           |                           |         |
| Systolic blood pressure, mmHg                          |                           |                           |                           | 0.135   |
| Mean (SD)                                              | 114.4 (17.9)              | 115.2 (17.4)              | 114.0 (18.1)              |         |
| Diastolic blood pressure, mmHg                         |                           |                           |                           | <.001   |
| Mean (SD)                                              | 70.6 (13.2)               | 72.5 (13.0)               | 69.8 (13.2)               |         |
| Heart rate, BPM                                        |                           |                           |                           | <.001   |
| Mean (SD)                                              | 82.8 (15.8)               | 86.3 (15.5)               | 81.3 (15.6)               |         |
| BMI, kg/m <sup>2</sup>                                 |                           |                           |                           | 0.01    |
| Mean (SD)                                              | 31.32 (9.02)              | 31.97 (8.71)              | 31.03 (9.14)              |         |
| <b>Heart Failure Characteristics</b>                   |                           |                           |                           |         |
| Duration of diagnosis prior to hospitalization:        |                           |                           |                           |         |
| ≤ 30 days Duration                                     | 78 (6.1%)                 | 0                         | 78 (6.1%)                 |         |
| > 30 days and ≤ 12 months Duration                     | 229 (17.9%)               | 0                         | 229 (17.9%)               |         |
| > 12 months Duration                                   | 864 (67.7%)               | 0                         | 864 (67.7%)               |         |
| Unknown                                                | 106 (8.3%)                | 0                         | 106 (8.3%)                |         |
| New York Heart Association class at hospital admission |                           |                           |                           | 0.003   |
| I                                                      | 25 (1.4%)                 | 5 (0.9%)                  | 20 (1.6%)                 |         |
| II                                                     | 196 (10.7%)               | 56 (10.1%)                | 140 (11.0%)               |         |
| III                                                    | 788 (43.0%)               | 220 (39.6%)               | 568 (44.5%)               |         |
| IV                                                     | 289 (15.8%)               | 78 (14.0%)                | 211 (16.5%)               |         |
| Unknown                                                | 533 (29.1%)               | 197 (35.4%)               | 336 (26.4%)               |         |
| New York Heart Association class at randomization      |                           |                           |                           | 0.005   |
| I                                                      | 49 (2.7%)                 | 10 (1.8%)                 | 39 (3.1%)                 |         |
| II                                                     | 432 (23.5%)               | 137 (24.6%)               | 295 (23.1%)               |         |
| III                                                    | 652 (35.5%)               | 170 (30.5%)               | 482 (37.7%)               |         |
| IV                                                     | 155 (8.4%)                | 47 (8.4%)                 | 108 (8.5%)                |         |
| Unknown                                                | 547 (29.8%)               | 194 (34.8%)               | 353 (27.6%)               |         |
| KCCQ Baseline Clinical Summary Score                   |                           |                           |                           | 0.01    |

|                                                                                                     | <b>All Patients<br/>N=1,835</b> | <b>De novo<br/>N=558</b> | <b>WHF<br/>N=1,277</b> | <b>P-value</b> |
|-----------------------------------------------------------------------------------------------------|---------------------------------|--------------------------|------------------------|----------------|
| Mean (SD)                                                                                           | 44.59 (23.17)                   | 46.85 (23.40)            | 43.60 (23.01)          |                |
| Median (25 <sup>th</sup> , 75 <sup>th</sup> )                                                       | 42.7 (27.1, 60.9)               | 46.4 (29.7, 64.1)        | 41.7 (26.0, 60.3)      |                |
| Ischemic etiology                                                                                   | 586 (31.9%)                     | 118 (21.1%)              | 468 (36.6%)            | <.001          |
| Chronic kidney disease                                                                              | 588 (32.0%)                     | 71 (12.7%)               | 517 (40.5%)            | <.001          |
| Diabetes mellitus                                                                                   | 842 (45.9%)                     | 187 (33.5%)              | 655 (51.3%)            | <.001          |
| Hypertension                                                                                        | 1424 (77.8%)                    | 373 (67.2%)              | 1051 (82.4%)           | <.001          |
| Atrial fibrillation or atrial flutter                                                               | 739 (40.6%)                     | 146 (26.4%)              | 593 (46.8%)            | <.001          |
| Chronic lung disease (including COPD)                                                               | 386 (21.1%)                     | 70 (12.6%)               | 316 (24.8%)            | <.001          |
| <b>Loop diuretics</b>                                                                               |                                 |                          |                        |                |
| Oral loop diuretic <u>prior</u> to index hospital admission (most recent)                           |                                 |                          |                        | <.001          |
| No                                                                                                  | 658 (35.9%)                     | 462 (82.8%)              | 196 (15.3%)            |                |
| Yes                                                                                                 | 1177 (64.1%)                    | 96 (17.2%)               | 1081 (84.7%)           |                |
| Total daily dose prescribed (furosemide equivalents), mg                                            |                                 |                          |                        | <.001          |
| Mean (SD)                                                                                           | 67.4 (62.5)                     | 44.1 (27.3)              | 69.5 (64.3)            |                |
| <b>Specific Loop Diuretic Prior to Index Admission (among those on a loop diuretic)<sup>1</sup></b> |                                 |                          |                        |                |
| Furosemide                                                                                          | 928 (78.8%)                     | 86 (89.6%)               | 842 (77.9%)            |                |
| Torsemide                                                                                           | 163 (13.8%)                     | 6 (6.3%)                 | 157 (14.5%)            |                |
| Bumetanide                                                                                          | 86 (7.3%)                       | 4 (4.2%)                 | 82 (7.6%)              |                |
| Ethacrynic acid                                                                                     | 0 (0.0%)                        | 0 (0.0%)                 | 0 (0.0%)               |                |
| <b>Discharge</b>                                                                                    |                                 |                          |                        |                |
| Prescribed <u>assigned</u> loop diuretic <sup>2</sup>                                               | 1598 (90.5%)                    | 495 (92.4%)              | 1103 (89.7%)           | 0.02           |
| Total daily dose prescribed (furosemide equivalents) <sup>1</sup> , mg                              |                                 |                          |                        | <.001          |
| Mean (SD)                                                                                           | 81.3 (66.5)                     | 67.4 (55.3)              | 87.6 (70.2)            |                |
| Total daily dose prescribed (reported), mg                                                          |                                 |                          |                        | <.001          |
| Mean (SD)                                                                                           | 61.2 (53.3)                     | 52.0 (48.2)              | 65.4 (54.9)            |                |
| <b>Baseline medications taken at the time of randomization</b>                                      |                                 |                          |                        |                |
| ACE or ARB                                                                                          | 821 (44.7%)                     | 277 (49.6%)              | 544 (42.6%)            | 0.005          |
| Angiotensin receptor-neprilysin inhibitor (ARNi) <sup>3</sup>                                       | 463 (25.2%)                     | 132 (23.7%)              | 331 (25.9%)            | 0.30           |
| ACE or ARB or ARNi                                                                                  | 1240 (67.6%)                    | 393 (70.4%)              | 847 (66.3%)            | 0.08           |

|                                                                      | <b>All Patients<br/>N=1,835</b> | <b>De novo<br/>N=558</b> | <b>WHF<br/>N=1,277</b> | <b>P-value</b> |
|----------------------------------------------------------------------|---------------------------------|--------------------------|------------------------|----------------|
| Aldosterone antagonist / mineralocorticoid receptor antagonist (MRA) | 813 (44.3%)                     | 241 (43.2%)              | 572 (44.8%)            | 0.52           |
| Beta blocker                                                         | 1496 (81.5%)                    | 423 (75.8%)              | 1073 (84.0%)           | <.001          |
| SGLT-2 inhibitor                                                     | 139 (7.8%)                      | 38 (7.0%)                | 101 (8.2%)             | 0.38           |
| Long-acting nitrate                                                  | 266 (14.5%)                     | 57 (10.2%)               | 209 (16.4%)            | <.001          |
| Thiazide diuretic                                                    | 65 (3.6%)                       | 16 (2.9%)                | 49 (3.9%)              | 0.30           |
| Digoxin                                                              | 125 (6.8%)                      | 23 (4.1%)                | 102 (8.0%)             | 0.002          |
| Hydralazine                                                          | 263 (14.3%)                     | 69 (12.4%)               | 194 (15.2%)            | 0.11           |
| Ivabradine                                                           | 7 (0.4%)                        | 1 (0.2%)                 | 6 (0.5%)               | 0.68           |

<sup>1</sup> Loop diuretic doses were converted to Furosemide equivalents with 1mg Bumetanide = 20mg Torsemide = 50mg Ethacrynic acid = 40mg Furosemide for oral diuretics; and 1mg Bumetanide = 50mg Ethacrynic acid = 20mg Furosemide for intravenous diuretics.

<sup>2</sup> Denominator is the patients with known prescription status of the assigned loop diuretic at each visit (i.e., excludes patients who died by the time of the visit or who had unknown prescription status at the visit).

<sup>3</sup> Angiotensin receptor-neprilysin inhibitor (ARNi) was reported as being taken (Y) or missing. For calculating the percent of patients on this medication at baseline, if it was not reported as Yes, it was assumed to be No.

eTable 2. Baseline characteristics of study participants (Demographics, Laboratory, and Vital Signs, Heart Failure Characteristics and Medical History) by HF type, for patients with >40% EF

|                                                                  | All Patients<br>N=799   | De novo<br>N=227        | WHF<br>N=572            | P-value |
|------------------------------------------------------------------|-------------------------|-------------------------|-------------------------|---------|
| <b>Demographics</b>                                              |                         |                         |                         |         |
| Age, years                                                       |                         |                         |                         | <.001   |
| N                                                                | 799                     | 227                     | 572                     |         |
| Mean (SD)                                                        | 69.5 (12.8)             | 66.3 (13.5)             | 70.8 (12.3)             |         |
| Median (25 <sup>th</sup> , 75 <sup>th</sup> )                    | 71.0 (62, 78)           | 68.0 (58, 77)           | 73.0 (64, 80)           |         |
| Female sex                                                       | 385 (48.2%)             | 96 (42.3%)              | 289 (50.5%)             | 0.04    |
| Race                                                             |                         |                         |                         | 0.9     |
| American Indian or Alaska Native                                 | 2 (0.3%)                | 0 (0.0%)                | 2 (0.4%)                |         |
| Asian                                                            | 13 (1.6%)               | 4 (1.8%)                | 9 (1.6%)                |         |
| Black or African American                                        | 221 (27.7%)             | 59 (26.0%)              | 162 (28.4%)             |         |
| Native Hawaiian or Other Pacific Islander                        | 1 (0.1%)                | 0 (0.0%)                | 1 (0.2%)                |         |
| White                                                            | 535 (67.1%)             | 158 (69.6%)             | 377 (66.1%)             |         |
| Other                                                            | 9 (1.1%)                | 3 (1.3%)                | 6 (1.1%)                |         |
| Multiple                                                         | 16 (2.0%)               | 3 (1.3%)                | 13 (2.3%)               |         |
| Hispanic or Latino                                               | 37 (4.6%)               | 10 (4.4%)               | 27 (4.7%)               | 0.85    |
| <b>Laboratory values</b>                                         |                         |                         |                         |         |
| Sodium, mEq/L                                                    |                         |                         |                         | 0.91    |
| Mean (SD)                                                        | 138.3 (3.7)             | 138.3 (3.6)             | 138.3 (3.7)             |         |
| Potassium, mEq/L                                                 |                         |                         |                         | 0.01    |
| Mean (SD)                                                        | 4.02 (0.47)             | 3.96 (0.46)             | 4.04 (0.47)             |         |
| Blood urea nitrogen, mg/dL                                       |                         |                         |                         | <.001   |
| Mean (SD)                                                        | 35.8 (40.5)             | 28.1 (26.1)             | 38.9 (44.6)             |         |
| Creatinine, mg/dL                                                |                         |                         |                         | <.001   |
| Mean (SD)                                                        | 1.442 (0.684)           | 1.292 (0.646)           | 1.502 (0.690)           |         |
| Estimated Glomerular filtration rate, mL/min/1.73 m <sup>2</sup> |                         |                         |                         | <.001   |
| Mean (SD)                                                        | 56.1 (24.9)             | 64.0 (24.5)             | 53.0 (24.3)             |         |
| N-Terminal pro B-type natriuretic peptide, pg/mL                 |                         |                         |                         | 0.33    |
| N                                                                | 442                     | 113                     | 329                     |         |
| Median (25 <sup>th</sup> , 75 <sup>th</sup> )                    | 2855.0 (1341.0, 5723.0) | 2565.0 (1567.0, 4555.0) | 2988.0 (1335.0, 6326.0) |         |
| B-type natriuretic peptide (BNP), pg/mL                          |                         |                         |                         | 0.05    |

|                                                        | All Patients<br>N=799 | De novo<br>N=227     | WHF<br>N=572          | P-value |
|--------------------------------------------------------|-----------------------|----------------------|-----------------------|---------|
| N                                                      | 359                   | 115                  | 244                   |         |
| Median (25 <sup>th</sup> , 75 <sup>th</sup> )          | 558.0 (335.0, 1041.0) | 508.0 (313.9, 886.0) | 626.5 (341.0, 1152.0) |         |
| Hemoglobin, g/L                                        |                       |                      |                       | <.001   |
| Mean (SD)                                              | 11.39 (6.76)          | 11.66 (2.45)         | 11.28 (7.84)          |         |
| <b>Vital signs</b>                                     |                       |                      |                       |         |
| Systolic blood pressure, mmHg                          |                       |                      |                       | 0.26    |
| Mean (SD)                                              | 127.9 (20.0)          | 129.3 (20.5)         | 127.3 (19.8)          |         |
| Diastolic blood pressure, mmHg                         |                       |                      |                       | 0.003   |
| Mean (SD)                                              | 68.2 (12.5)           | 70.4 (13.0)          | 67.3 (12.2)           |         |
| Heart rate, BPM                                        |                       |                      |                       | 0.03    |
| Mean (SD)                                              | 76.6 (15.2)           | 78.5 (15.9)          | 75.9 (14.8)           |         |
| BMI, kg/m <sup>2</sup>                                 |                       |                      |                       | 0.8     |
| Mean (SD)                                              | 34.20 (10.18)         | 34.02 (9.90)         | 34.27 (10.30)         |         |
| <b>Heart Failure Characteristics</b>                   |                       |                      |                       |         |
| Duration of diagnosis prior to hospitalization:        |                       |                      |                       |         |
| ≤ 30 days Duration                                     | 32 (5.6%)             | 0                    | 32 (5.6%)             |         |
| > 30 days and ≤ 12 months Duration                     | 98 (17.1%)            | 0                    | 98 (17.1%)            |         |
| > 12 months Duration                                   | 373 (65.2%)           | 0                    | 373 (65.2%)           |         |
| Unknown                                                | 69 (12.1%)            | 0                    | 69 (12.1%)            |         |
| New York Heart Association class at hospital admission |                       |                      |                       | 0.021   |
| I                                                      | 9 (1.1%)              | 2 (0.9%)             | 7 (1.2%)              |         |
| II                                                     | 77 (9.7%)             | 27 (11.9%)           | 50 (8.8%)             |         |
| III                                                    | 333 (41.8%)           | 82 (36.1%)           | 251 (44.0%)           |         |
| IV                                                     | 93 (11.7%)            | 19 (8.4%)            | 74 (13.0%)            |         |
| Unknown                                                | 285 (35.8%)           | 97 (42.7%)           | 188 (33.0%)           |         |
| New York Heart Association class at randomization      |                       |                      |                       | 0.03    |
| I                                                      | 18 (2.3%)             | 5 (2.2%)             | 13 (2.3%)             |         |
| II                                                     | 189 (23.7%)           | 60 (26.4%)           | 129 (22.6%)           |         |
| III                                                    | 263 (32.9%)           | 63 (27.8%)           | 200 (35.0%)           |         |
| IV                                                     | 31 (3.9%)             | 3 (1.3%)             | 28 (4.9%)             |         |
| Unknown                                                | 298 (37.3%)           | 96 (42.3%)           | 202 (35.3%)           |         |
| KCCQ Baseline Clinical Summary Score                   |                       |                      |                       | 0.002   |
| Mean (SD)                                              | 41.07 (22.99)         | 45.14 (23.52)        | 39.49 (22.60)         |         |



|                                                                                                     | All Patients<br>N=799 | De novo<br>N=227  | WHF<br>N=572      | P-value |
|-----------------------------------------------------------------------------------------------------|-----------------------|-------------------|-------------------|---------|
| Median (25 <sup>th</sup> , 75 <sup>th</sup> )                                                       | 37.5 (22.9, 57.5)     | 42.7 (26.6, 60.4) | 36.1 (21.9, 55.2) |         |
| Ischemic etiology                                                                                   | 170 (21.3%)           | 37 (16.3%)        | 133 (23.3%)       | 0.02    |
| Chronic kidney disease                                                                              | 330 (41.3%)           | 55 (24.2%)        | 275 (48.1%)       | <.001   |
| Diabetes mellitus                                                                                   | 420 (52.6%)           | 108 (47.6%)       | 312 (54.5%)       | 0.07    |
| Hypertension                                                                                        | 711 (89.1%)           | 193 (85.0%)       | 518 (90.7%)       | 0.02    |
| Atrial fibrillation or atrial flutter                                                               | 427 (53.5%)           | 93 (41.2%)        | 334 (58.4%)       | <.001   |
| Chronic lung disease (including COPD)                                                               | 238 (30.2%)           | 34 (15.2%)        | 204 (36.1%)       | <.001   |
| <b>Loop diuretics</b>                                                                               |                       |                   |                   |         |
| Oral loop diuretic <u>prior</u> to index hospital admission (most recent)                           |                       |                   |                   | <.001   |
| No                                                                                                  | 218 (27.3%)           | 149 (65.6%)       | 69 (12.1%)        |         |
| Yes                                                                                                 | 581 (72.7%)           | 78 (34.4%)        | 503 (87.9%)       |         |
| Total daily dose prescribed (furosemide equivalents), mg                                            |                       |                   |                   | <.001   |
| Mean (SD)                                                                                           | 63.6 (61.6)           | 43.7 (31.7)       | 66.6 (64.4)       |         |
| <b>Specific Loop Diuretic Prior to Index Admission (among those on a loop diuretic)<sup>1</sup></b> |                       |                   |                   |         |
| Furosemide                                                                                          | 470 (80.9%)           | 73 (93.6%)        | 397 (78.9%)       |         |
| Torsemide                                                                                           | 77 (13.3%)            | 3 (3.8%)          | 74 (14.7%)        |         |
| Bumetanide                                                                                          | 34 (5.9%)             | 2 (2.6%)          | 32 (6.4%)         |         |
| Ethacrynic acid                                                                                     | 0 (0.0%)              | 0 (0.0%)          | 0 (0.0%)          |         |
| <b>Discharge</b>                                                                                    |                       |                   |                   |         |
| Prescribed <u>assigned</u> loop diuretic <sup>2</sup>                                               | 707 (90.8%)           | 197 (90.0%)       | 510 (91.1%)       | 0.9     |
| Total daily dose prescribed (furosemide equivalents) <sup>1</sup> , mg                              |                       |                   |                   | <.001   |
| N                                                                                                   | 678                   | 183               | 495               |         |
| Mean (SD)                                                                                           | 77.3 (58.7)           | 59.5 (44.5)       | 83.9 (61.9)       |         |
| Median (25 <sup>th</sup> , 75 <sup>th</sup> )                                                       | 80 (40, 80)           | 40 (40, 80)       | 80 (40, 120)      |         |
| Total daily dose prescribed (reported), mg                                                          |                       |                   |                   | <.001   |
| N                                                                                                   | 678                   | 183               | 495               |         |
| Mean (SD)                                                                                           | 57.6 (47.0)           | 45.9 (42.6)       | 61.9 (47.8)       |         |
| Median (25 <sup>th</sup> , 75 <sup>th</sup> )                                                       | 40 (20, 80)           | 40 (20, 40)       | 40 (20, 80)       |         |
| <b>Baseline medications taken at the time of randomization</b>                                      |                       |                   |                   |         |
| ACE or ARB                                                                                          | 319 (39.9%)           | 107 (47.1%)       | 212 (37.1%)       | 0.01    |
| Angiotensin receptor-neprilysin inhibitor (ARNi) <sup>3</sup>                                       | 48 (6.0%)             | 7 (3.1%)          | 41 (7.2%)         | 0.03    |
| ACE or ARB or ARNi                                                                                  | 360 (45.1%)           | 112 (49.3%)       | 248 / 572 (43.4%) | 0.12    |
| Aldosterone antagonist / mineralocorticoid receptor antagonist (MRA)                                | 158 (19.8%)           | 29 (12.8%)        | 129 / 572 (22.6%) | 0.002   |

|                     | <b>All Patients<br/>N=799</b> | <b>De novo<br/>N=227</b> | <b>WHF<br/>N=572</b> | <b>P-value</b> |
|---------------------|-------------------------------|--------------------------|----------------------|----------------|
| Beta blocker        | 592 (74.1%)                   | 159 (70.0%)              | 433 (75.7%)          | 0.10           |
| SGLT-2 inhibitor    | 22 (2.9%)                     | 6 (2.7%)                 | 16 (2.9%)            | 0.86           |
| Long-acting nitrate | 103 (12.9%)                   | 19 (8.4%)                | 84 (14.8%)           | 0.01           |
| Thiazide diuretic   | 50 (6.3%)                     | 16 (7.1%)                | 34 (6.0%)            | 0.6            |
| Digoxin             | 31 (3.9%)                     | 8 (3.5%)                 | 23 (4.0%)            | 0.7            |
| Hydralazine         | 130 (16.3%)                   | 28 (12.3%)               | 102 (17.8%)          | 0.1            |
| Ivabradine          | 0 (0.0%)                      | 0 (0.0%)                 | 0 (0.0%)             |                |

<sup>1</sup> Loop diuretic doses were converted to Furosemide equivalents with 1mg Bumetanide = 20mg Torsemide = 50mg Ethacrynic acid = 40mg Furosemide for oral diuretics; and 1mg Bumetanide = 50mg Ethacrynic acid = 20mg Furosemide for intravenous diuretics.

<sup>2</sup> Denominator is the patients with known prescription status of the assigned loop diuretic at each visit (i.e., excludes patients who died by the time of the visit or who had unknown prescription status at the visit).

<sup>3</sup> Angiotensin receptor-neprilysin inhibitor (ARNi) was reported as being taken (Y) or missing. For calculating the percent of patients on this medication at baseline, if it was not reported as Yes, it was assumed to be N

eTable 3: Time-to-event outcome comparison between de-novo and WHF for overall patients and stratified by ejection fraction

| Outcomes                                                        | De Novo HF <sup>1</sup><br>N=838<br>events<br>(rate per 100<br>patient-years) | WHF <sup>1</sup><br>N=2,020<br>events<br>(rate per 100<br>patient-years) | Unadjusted                  |                      | Adjusted                    |                      | Interaction P-<br>Value <sup>3</sup> |
|-----------------------------------------------------------------|-------------------------------------------------------------------------------|--------------------------------------------------------------------------|-----------------------------|----------------------|-----------------------------|----------------------|--------------------------------------|
|                                                                 |                                                                               |                                                                          | HR<br>(95% CI) <sup>2</sup> | P-value <sup>2</sup> | HR<br>(95% CI) <sup>2</sup> | P-value <sup>2</sup> |                                      |
| <b>All-Cause Mortality over 12 Months</b>                       |                                                                               |                                                                          |                             |                      |                             |                      |                                      |
| Overall                                                         | 65 (9.1)                                                                      | 408 (25.4)                                                               | 0.36 (0.28, 0.47)           | <0.001               | 0.50 (0.38, 0.66)           | <0.001               |                                      |
| <b>EF Level</b>                                                 |                                                                               |                                                                          |                             |                      |                             |                      | 0.28                                 |
| ≤40%                                                            | 38 (8.0)                                                                      | 262 (26.0)                                                               | 0.31 (0.22, 0.44)           | <0.001               | 0.55 (0.38, 0.78)           | <0.001               |                                      |
| >40%                                                            | 19 (9.5)                                                                      | 109 (23.3)                                                               | 0.41 (0.25, 0.67)           | <0.001               | 0.76 (0.46, 1.25)           | 0.28                 |                                      |
| <b>All-Cause Mortality or Re-hospitalization over 12 Months</b> |                                                                               |                                                                          |                             |                      |                             |                      |                                      |
| Overall                                                         | 293 (67.1)                                                                    | 1080 (118.3)                                                             | 0.58 (0.51, 0.66)           | <0.001               | 0.67 (0.61, 0.80)           | <0.001               |                                      |
| <b>EF Level</b>                                                 |                                                                               |                                                                          |                             |                      |                             |                      | 0.22                                 |
| ≤40%                                                            | 173 (58.0)                                                                    | 678 (118.6)                                                              | 0.50 (0.43, 0.60)           | <0.001               | 0.72 (0.60, 0.85)           | <0.001               |                                      |
| >40%                                                            | 95 (84.4)                                                                     | 311 (117.4)                                                              | 0.73 (0.58, 0.92)           | 0.01                 | 0.86 (0.68, 1.08)           | 0.12                 |                                      |
| <b>All-Cause First Re-hospitalization over 12 Months</b>        |                                                                               |                                                                          |                             |                      |                             |                      |                                      |
| Overall                                                         | 253 (59.2)                                                                    | 853 (99.1)                                                               | 0.62 (0.54, 0.71)           | <0.001               | 0.71 (0.61, 0.83)           | <0.001               |                                      |
| <b>EF Level</b>                                                 |                                                                               |                                                                          |                             |                      |                             |                      | 0.22                                 |
| ≤40%                                                            | 146 (50.0)                                                                    | 531 (98.4)                                                               | 0.53 (0.44, 0.63)           | <0.001               | 0.72 (0.59, 0.87)           | <0.001               |                                      |
| >40%                                                            | 85 (77.5)                                                                     | 252 (100.9)                                                              | 0.78 (0.61, 1.00)           | 0.05                 | 0.87 (0.68, 1.12)           | 0.28                 |                                      |

1 For each cell, for all-cause mortality and all-cause mortality or re-hospitalization over 12 months, the numbers displayed are number of events (Kaplan-Meier failure rate %) event rate per 100 patient-years of follow-up. For all-cause first re-hospitalization, the numbers displayed are number of events (cumulative incidence rate %) event rate per 100 patient-years of follow-up.

2 For all-cause mortality and all-cause mortality/re-hospitalization over 12 months, hazard ratio (HR), 95% confidence interval (CI) and p-value are based on a Cox proportional hazards regression model. For all-cause first primary re-hospitalization over 12 months, hazard ratio (HR), 95% confidence interval (CI) and p-value is based on a Cox proportional hazards model where death is considered as competing risk and is censored at time of death. Unadjusted models will only contain main effect HF type (De Novo, worsening HF) as covariate. All adjusted models for overall patients contain main effect HF type (De Novo, worsening HF), age, sex, race, baseline ejection fraction categories (≤40%, 41-49%, ≥50% and unknown), systolic blood pressure, eGFR, hemoglobin, body mass index (BMI), diabetes, atrial fibrillation/flutter, ischemic etiology, chronic lung disease. For adjusted model in the stratified analyses by EF levels (≤40, >40), the same covariates are used, except that baseline ejection fraction will be continuous.

3 The interaction p-value for HF type and baseline EF levels (≤40%, >40%) are derived from adjusted model for patients with known EF levels. The covariates are HF type (De Novo, worsening HF), age, sex, race, baseline ejection fraction levels (≤40%, >40%), systolic blood pressure, eGFR, hemoglobin, body mass index (BMI), diabetes, atrial fibrillation/flutter, ischemic etiology, chronic lung disease and the interaction term.

eTable 4. Effect of HF type on total re-hospitalizations through Month 12 for overall patients and stratified by ejection fraction

| Outcomes                                              | De Novo HF<br>N=838 | WHF<br>N=2,020 | All Patients<br>N=2,858 | Unadjusted NBR              |                          | Adjusted NRB                |                          | Interaction<br>P-Value <sup>3</sup> |
|-------------------------------------------------------|---------------------|----------------|-------------------------|-----------------------------|--------------------------|-----------------------------|--------------------------|-------------------------------------|
|                                                       |                     |                |                         | RR<br>(95% CI) <sup>2</sup> | P-<br>Value <sup>2</sup> | RR<br>(95% CI) <sup>2</sup> | P-<br>Value <sup>2</sup> |                                     |
| <b>Overall</b>                                        |                     |                |                         | 0.57 (0.49, 0.65)           | <0.001                   | 0.64 (0.56, 0.75)           | <0.001                   |                                     |
| Patients with a re-hospitalization event <sup>1</sup> | 253 (30.2%)         | 853 (42.2%)    | 1106 (38.7%)            |                             |                          |                             |                          |                                     |
| First event rate per 100 pt-years                     | 59.2                | 99.1           | 85.9                    |                             |                          |                             |                          |                                     |
| Total number of events                                | 394                 | 1514           | 1908                    |                             |                          |                             |                          |                                     |
| Total event rate per 100 pt-years                     | 71.5                | 123.2          | 107.2                   |                             |                          |                             |                          |                                     |
| <b>EF Level</b>                                       |                     |                |                         |                             |                          |                             |                          | 0.01                                |
| <b>≤40%</b>                                           |                     |                |                         | 0.46 (0.38, 0.55)           | <0.001                   | 0.53 (0.44, 0.64)           | <0.001                   |                                     |
| Patients with a re-hospitalization event <sup>1</sup> | 146 (26.2%)         | 531 (41.6%)    | 677 (36.9%)             |                             |                          |                             |                          |                                     |
| First event rate per 100 pt-years                     | 50.0                | 98.4           | 81.4                    |                             |                          |                             |                          |                                     |
| Total number of events                                | 211                 | 964            | 1175                    |                             |                          |                             |                          |                                     |
| Total event rate per 100 pt-years                     | 58.1                | 125.5          | 103.9                   |                             |                          |                             |                          |                                     |
| <b>&gt;40%</b>                                        |                     |                |                         | 0.74 (0.58, 0.95)           | 0.02                     | 0.82 (0.64, 1.05)           | 0.11                     |                                     |
| Patients with a re-hospitalization event <sup>1</sup> | 85 (37.4%)          | 252 (44.1%)    | 337 (42.2%)             |                             |                          |                             |                          |                                     |
| First event rate per 100 pt-years                     | 77.5                | 100.9          | 93.7                    |                             |                          |                             |                          |                                     |
| Total number of events                                | 148                 | 447            | 595                     |                             |                          |                             |                          |                                     |
| Total event rate per 100 pt-years                     | 96.2                | 123.3          | 115.2                   |                             |                          |                             |                          |                                     |

<sup>1</sup> Re-hospitalization defined as at least a 24-hour stay (or a change in calendar date if the time of admission/discharge is not available) or reported as an in-patient admission by the patient/proxy with an admission date and no discharge date. The numbers displayed are number of events (% of patients with events).

<sup>2</sup> Relative risk (RR), 95% confidence interval (CI) and p-value are from a negative binomial regression (NBR) of the frequency of re-hospitalizations with an offset term of the log of each subject's months to last rehospitalization assessment through month 12. Unadjusted models contain only main effect HF type (De Novo, worsening HF) as covariate. All adjusted models contain main effect HF type (De Novo, worsening HF), age, sex, race, baseline ejection fraction categories (≤40, 41-49, ≥50, unknown), systolic blood pressure, eGFR, hemoglobin, body mass index (BMI), diabetes, atrial fibrillation/flutter, ischemic etiology, chronic lung disease. For adjusted model in the analyses stratified by EF levels (≤40, >40), the same covariates are used, except that continuous baseline ejection fraction will be used as covariate.

<sup>3</sup> The interaction p-value for HF type and baseline EF levels (≤40%, >40%) are derived from adjusted model for patients with known EF levels. The covariates are HF type (De Novo, worsening HF), age, sex, race, baseline ejection fraction levels (≤40%, >40%), systolic blood pressure, eGFR, hemoglobin, body mass index (BMI), diabetes, atrial fibrillation/flutter, ischemic etiology, chronic lung disease and the interaction term.

eTable 5. Comparison of KCCQ Clinical Summary Score by HF Type for overall patients and by EF levels – Least Square Mean by Visit

|                                               | Unadjusted              |                         |                                                                     |                      | Adjusted                |                         |                                                                     |                      | Interaction P-value <sup>2</sup> |
|-----------------------------------------------|-------------------------|-------------------------|---------------------------------------------------------------------|----------------------|-------------------------|-------------------------|---------------------------------------------------------------------|----------------------|----------------------------------|
|                                               | Least Square Means      |                         | Estimated Difference in Means (95% CI) (De novo – WHF) <sup>1</sup> | P-value <sup>2</sup> | Least Square Means      |                         | Estimated Difference in Means (95% CI) (De novo – WHF) <sup>1</sup> | P-value <sup>2</sup> |                                  |
|                                               | De Novo HF N=838        | WHF N=2,020             |                                                                     |                      |                         | De Novo HF N=838        |                                                                     |                      | WHF N=2,020                      |
| <b>Month 1 Change from Baseline (95% CI)</b>  |                         |                         |                                                                     |                      |                         |                         |                                                                     |                      |                                  |
| Overall                                       | 35.45<br>(33.65, 37.25) | 26.34<br>(25.14, 27.55) | 9.11<br>(6.94, 11.27)                                               | <0.001               | 29.83<br>(27.40, 32.26) | 22.21<br>(20.30, 24.11) | 7.63<br>(5.37, 9.89)                                                | <0.001               |                                  |
| <b>EF Levels</b>                              |                         |                         |                                                                     |                      |                         |                         |                                                                     |                      | 0.63                             |
| EF≤40%                                        | 36.83<br>(34.67, 39.00) | 27.76<br>(26.26, 29.25) | 9.08<br>(6.44, 11.71)                                               | <0.001               | 32.80<br>(30.27, 35.34) | 24.84<br>(22.94, 26.74) | 7.96<br>(5.23, 10.70)                                               | <0.001               |                                  |
| EF>40%                                        | 31.73<br>(28.29, 35.18) | 23.28<br>(21.06, 25.50) | 8.46<br>(4.36, 12.55)                                               | <0.001               | 27.27<br>(23.57, 30.97) | 20.50<br>(17.95, 23.04) | 6.78<br>(2.67, 10.88)                                               | 0.001                |                                  |
| <b>Month 6 Change from Baseline (95% CI)</b>  |                         |                         |                                                                     |                      |                         |                         |                                                                     |                      |                                  |
| Overall                                       | 35.57<br>(33.65, 37.49) | 28.89<br>(27.58, 30.21) | 6.68<br>(4.35, 9.01)                                                | <0.001               | 30.03<br>(27.52, 32.54) | 24.89<br>(22.91, 26.87) | 5.14<br>(2.74, 7.55)                                                | <0.001               |                                  |
| <b>EF Levels</b>                              |                         |                         |                                                                     |                      |                         |                         |                                                                     |                      | 0.64                             |
| EF≤40%                                        | 37.34<br>(35.01, 39.67) | 30.32<br>(28.67, 31.97) | 7.01<br>(4.16, 9.87)                                                | <0.001               | 33.31<br>(30.65, 35.98) | 27.58<br>(25.56, 29.60) | 5.73<br>(2.79, 8.68)                                                | <0.001               |                                  |
| EF>40%                                        | 30.99<br>(27.37, 34.61) | 24.87<br>(22.44, 27.30) | 6.12<br>(1.76, 10.48)                                               | 0.01                 | 26.61<br>(22.76, 30.47) | 22.12<br>(19.39, 24.85) | 4.49<br>(0.14, 8.84)                                                | 0.04                 |                                  |
| <b>Month 12 Change from Baseline (95% CI)</b> |                         |                         |                                                                     |                      |                         |                         |                                                                     |                      |                                  |
| Overall                                       | 35.50<br>(33.48, 37.52) | 27.70<br>(26.27, 29.14) | 7.79<br>(5.31, 10.27)                                               | <0.001               | 29.94<br>(27.35, 32.54) | 23.68<br>(21.62, 25.74) | 6.26<br>(3.72, 8.81)                                                | <0.001               |                                  |
| <b>EF Levels</b>                              |                         |                         |                                                                     |                      |                         |                         |                                                                     |                      | 0.77                             |

|                  | Unadjusted              |                         |                                                                     |                      | Adjusted                |                         |                                                                     |                      |                                  |
|------------------|-------------------------|-------------------------|---------------------------------------------------------------------|----------------------|-------------------------|-------------------------|---------------------------------------------------------------------|----------------------|----------------------------------|
|                  | Least Square Means      |                         | Estimated Difference in Means (95% CI) (De novo – WHF) <sup>1</sup> | P-value <sup>2</sup> | Least Square Means      |                         | Estimated Difference in Means (95% CI) (De novo – WHF) <sup>1</sup> | P-value <sup>2</sup> | Interaction P-value <sup>2</sup> |
| De Novo HF N=838 | WHF N=2,020             | De Novo HF N=838        |                                                                     |                      | WHF N=2,020             |                         |                                                                     |                      |                                  |
| EF≤40%           | 37.08<br>(34.63, 39.53) | 29.43<br>(27.64, 31.22) | 7.65<br>(4.62, 10.69)                                               | <0.001               | 33.04<br>(30.26, 35.82) | 26.63<br>(24.49, 28.77) | 6.41<br>(3.29, 9.53)                                                | <0.001               |                                  |
| EF>40%           | 31.81<br>(28.02, 35.60) | 22.89<br>(20.27, 25.51) | 8.91<br>(4.30, 13.52)                                               | <0.001               | 27.33<br>(23.31, 31.35) | 20.11<br>(17.21, 23.02) | 7.21<br>(2.61, 11.82)                                               | 0.002                |                                  |

<sup>1</sup> Estimated difference in means, 95% confidence interval (CI) and p-value are from a linear mixed model with repeated measures on KCCQ-CSS score change from baseline in Month 12. Unadjusted models will include terms for HF type, time (i.e., visit) and HF type by time interaction as fixed effects, and the baseline score. Adjusted models for overall patients will include additional covariates for age, sex, race, baseline ejection fraction categories (<=40, 41-49, >= 50, unknown), systolic blood pressure, eGFR, hemoglobin, body mass index (BMI), diabetes, atrial fibrillation/flutter, ischemic etiology and chronic lung disease. For adjusted model in the stratified analyses by EF levels (<=40, >40), the same covariates are used, except that baseline ejection fraction will be continuous.

<sup>2</sup> The interaction p-value for HF type and baseline EF levels (<=40%, >40%) are derived from adjusted model for patients with known EF levels with additional covariates for age, sex, race, baseline ejection fraction categories (<=40, >40), systolic blood pressure, eGFR, hemoglobin, body mass index (BMI), diabetes, atrial fibrillation/flutter, ischemic etiology and chronic lung disease.

eTable 6. Treatment Effect on total re-hospitalizations through Month 12 by HF type for overall patients and stratified by EF levels

| Outcomes                                              | De Novo HF  |             |                              | WHF         |             |                              | Interaction P-Value <sup>3</sup> |
|-------------------------------------------------------|-------------|-------------|------------------------------|-------------|-------------|------------------------------|----------------------------------|
|                                                       | Torsemide   | Furosemide  | NBR RR (95% CI) <sup>2</sup> | Torsemide   | Furosemide  | NBR RR (95% CI) <sup>2</sup> |                                  |
| <b>Overall</b>                                        |             |             | 0.83 (0.65, 1.07)            |             |             | 0.98 (0.85, 1.12)            | 0.28                             |
| Patients with a re-hospitalization event <sup>1</sup> | 121 (28.3%) | 132 (32.2%) |                              | 411 (41.0%) | 442 (43.4%) |                              |                                  |
| First event rate per 100 pt-years                     | 54.8        | 63.9        |                              | 94.5        | 103.9       |                              |                                  |
| Total number of events                                | 184         | 210         |                              | 746         | 768         |                              |                                  |
| Total event rate per 100 pt-years                     | 65.7        | 77.5        |                              | 122.1       | 124.2       |                              |                                  |
| <b>EF Level</b>                                       |             |             |                              |             |             |                              |                                  |
| <b>≤40%</b>                                           |             |             | 0.82 (0.60, 1.13)            |             |             | 1.03 (0.86, 1.22)            | 0.23                             |
| Patients with a re-hospitalization event <sup>1</sup> | 74 (26.0%)  | 72 (26.4%)  |                              | 264 (40.7%) | 267 (42.5%) |                              |                                  |
| First event rate per 100 pt-years                     | 49.0        | 51.0        |                              | 95.0        | 102.1       |                              |                                  |
| Total number of events                                | 103         | 108         |                              | 496         | 468         |                              |                                  |
| Total event rate per 100 pt-years                     | 54.4        | 62.2        |                              | 127.7       | 123.2       |                              |                                  |
| <b>&gt;40%</b>                                        |             |             | 0.906 (0.602, 1.364)         |             |             | 0.87 (0.68, 1.11)            | 0.87                             |
| Patients with a re-hospitalization event <sup>1</sup> | 39 (32.8%)  | 46 (42.6%)  |                              | 118 (42.1%) | 134 (45.9%) |                              |                                  |
| First event rate per 100 pt-years                     | 67.6        | 88.4        |                              | 92.0        | 110.2       |                              |                                  |
| Total number of events                                | 70          | 78          |                              | 213         | 234         |                              |                                  |
| Total event rate per 100 pt-years                     | 91.5        | 100.8       |                              | 116.7       | 129.9       |                              |                                  |

<sup>1</sup> Re-hospitalization defined as at least a 24-hour stay (or a change in calendar date if the time of admission/discharge is not available) or reported as an in-patient admission by the patient/proxy with an admission date and no discharge date. The numbers displayed are number of events (% of patients with events).

<sup>2</sup> Relative risk (RR), 95% confidence interval (CI) and p-value are from a negative binomial regression (NBR) of the frequency of re-hospitalizations with an offset term of the log of each subject's months to last rehospitalization assessment through month 12. For the overall patient model, the covariates are diuretic treatment (torsemide, furosemide), HF type, age, sex, baseline EF categories (<=40, 41-49, >= 50, unknown). For each stratified analysis by EF level, the covariates are diuretic treatment, HF type, age, sex and continuous baseline EF.

<sup>3</sup> The interaction p-values are between diuretic treatment and HF type for overall patients and each EF level.

eTable 7. Comparison of KCCQ Clinical Summary Score between treatment diuretics groups by HF types – Least Square Mean by Visit for overall patients and stratified by EF levels

|                                               | De Novo HF          |                    |                                                 |                                    | WHF                   |                      |                                                 |                                    |                        |
|-----------------------------------------------|---------------------|--------------------|-------------------------------------------------|------------------------------------|-----------------------|----------------------|-------------------------------------------------|------------------------------------|------------------------|
|                                               | Furosemide<br>N=410 | Torsemide<br>N=428 | Estimated<br>Difference<br>in Means<br>(T vs F) | Estimated<br>Difference<br>P-value | Furosemide<br>N=1,018 | Torsemide<br>N=1,002 | Estimated<br>Difference<br>in Means<br>(T vs F) | Estimated<br>Difference<br>P-value | Interaction<br>P-value |
| <b>Month 1 Change from Baseline (95% CI)</b>  |                     |                    |                                                 |                                    |                       |                      |                                                 |                                    |                        |
| Overall                                       | 28.6 (25.6,31.7)    | 31.0 (28.0,34.0)   | 2.3 (-1.2, 5.9)                                 | 0.20                               | 21.7 (19.4,23.9)      | 22.7 (20.5,24.9)     | 1.0 (-1.3, 3.4)                                 | 0.4                                | 0.5                    |
| EF≤40%                                        | 30.4 (26.9,33.9)    | 32.6 (29.3,35.9)   | 2.2 (-2.03, 6.5)                                | 0.30                               | 23.6 (21.1,26.1)      | 25.1 (22.6,27.6)     | 1.5 (-1.4, 4.4)                                 | 0.3                                | 0.8                    |
| EF>40%                                        | 29.6 (23.9,35.2)    | 31.6 (25.9,37.3)   | 2.02 (-5.0, 9.03)                               | 0.57                               | 22.6 (18.5,26.7)      | 22.6 (18.6,26.6)     | -0.1 (-4.6, 4.4)                                | 0.9                                | 0.6                    |
| <b>Month 6 Change from Baseline (95% CI)</b>  |                     |                    |                                                 |                                    |                       |                      |                                                 |                                    |                        |
| Overall                                       | 29.5 (26.3,32.6)    | 30.6 (27.4,33.7)   | 1.1 (-2.7, 4.9)                                 | 0.6                                | 25.3 (23.0,27.7)      | 24.4 (22.0,26.7)     | -1.0 (-3.6, 1.6)                                | 0.5                                | 0.4                    |
| EF≤40%                                        | 32.2 (28.5,35.9)    | 32.0 (28.4,35.4)   | -0.3 (-4.9, 4.3)                                | 0.9                                | 26.9 (24.3,29.6)      | 27.3 (24.6,30.0)     | 0.4 (-2.9, 3.6)                                 | 0.8                                | 0.8                    |
| EF>40%                                        | 28.3 (22.7,34.0)    | 31.5 (25.6,37.4)   | 3.1 (-4.0,10.3)                                 | 0.4                                | 27.1 (22.8,31.4)      | 21.8 (17.7,26.0)     | 5.3 (-10.1,-0.5)                                | 0.03                               | 0.05                   |
| <b>Month 12 Change from Baseline (95% CI)</b> |                     |                    |                                                 |                                    |                       |                      |                                                 |                                    |                        |
| Overall                                       | 29.0 (25.7,32.3)    | 30.8 (27.6,34.1)   | 1.8 (-2.1, 5.8)                                 | 0.4                                | 24.0 (21.5,26.5)      | 23.3 (20.8,25.8)     | -0.7 (-3.6, 2.1)                                | 0.6                                | 0.3                    |
| EF≤40%                                        | 31.8 (28.1,35.5)    | 31.8 (28.2,35.4)   | -0.0 (-4.7, 4.7)                                | 1.0                                | 26.1 (23.3,28.8)      | 26.3 (23.5,29.1)     | 0.2 (-3.2, 3.6)                                 | 0.9                                | 0.9                    |
| EF>40%                                        | 28.7 (22.5,34.9)    | 32.8 (26.3,39.3)   | 4.1 (-4.0,12.1)                                 | 0.3                                | 24.0 (19.2,28.8)      | 20.6 (16.0,25.1)     | -3.4 (-9.0, 2.2)                                | 0.2                                | 0.1                    |



eTable 8. Diuretic dose adherence at Discharge, month 1, 6 and 12 by heart failure type and diuretic treatment

| Timepoint                                                              | De Novo           |                    | WHF               |                    | All Patients<br>N=2,786 |
|------------------------------------------------------------------------|-------------------|--------------------|-------------------|--------------------|-------------------------|
|                                                                        | Torsemide (N=413) | Furosemide (N=403) | Torsemide (N=976) | Furosemide (N=994) |                         |
| <b>Discharge</b>                                                       |                   |                    |                   |                    |                         |
| Patients with known loop diuretic status at discharge*                 | 391 (94.7%)       | 394 (97.8%)        | 939 (96.2%)       | 962 (96.8%)        | 2686 (96.4%)            |
| Prescribed <u>assigned</u> loop diuretic <sup>1</sup>                  | 349 (89.3%)       | 368 (93.4%)        | 838 (89.2%)       | 874 (90.9%)        | 2429 (90.4%)            |
| Total daily dose prescribed (furosemide equivalents) <sup>2</sup> , mg | 59.2 (50.4)       | 70.5 (52.6)        | 88.3 (75.3)       | 82.6 (57.9)        | 79.4 (63.6)             |
| Total daily dose prescribed (reported) <sup>2</sup> , mg               | 29.6 (25.2)       | 70.5 (52.6)        | 44.1 (37.6)       | 82.6 (57.9)        | 59.9 (51.2)             |
| Prescribed a different loop diuretic <sup>1</sup>                      | 28 (7.2%)         | 13 (3.3%)          | 80 (8.5%)         | 60 (6.2%)          | 181 (6.7%)              |
| Crossover (between arms) <sup>1</sup>                                  | 25 (6.4%)         | 8 (2.0%)           | 68 (7.2%)         | 43 (4.5%)          | 144 (5.4%)              |
| No loop diuretic currently prescribed <sup>1</sup>                     | 14 (3.6%)         | 13 (3.3%)          | 21 (2.2%)         | 28 (2.9%)          | 76 (2.8%)               |
| <b>Month 1</b>                                                         |                   |                    |                   |                    |                         |
| Patients with known loop diuretic status at Month 1*                   | 295 (98.0%)       | 293 (98.0%)        | 639 (98.3%)       | 660 (97.5%)        | 1887 (97.9%)            |
| Prescribed <u>assigned</u> loop diuretic <sup>1</sup>                  | 247 (83.7%)       | 249 (85.0%)        | 540 (84.5%)       | 556 (84.2%)        | 1592 (84.4%)            |
| Total daily dose prescribed (furosemide equivalents) <sup>2</sup> , mg | 55.5 (46.3)       | 58.8 (42.5)        | 86.1 (82.1)       | 72.3 (53.2)        | 72.1 (63.2)             |
| Total daily dose prescribed (reported) <sup>2</sup> , mg               | 27.8 (23.1)       | 58.8 (42.5)        | 43.0 (41.0)       | 72.3 (53.2)        | 53.4 (46.8)             |
| Prescribed a different loop diuretic <sup>1</sup>                      | 19 (6.4%)         | 17 (5.8%)          | 61 (9.5%)         | 75 (11.4%)         | 172 (9.1%)              |
| Crossover (between arms) <sup>1</sup>                                  | 18 (6.1%)         | 7 (2.4%)           | 52 (8.1%)         | 44 (6.7%)          | 121 (6.4%)              |
| No loop diuretic currently prescribed <sup>1</sup>                     | 29 (9.8%)         | 27 (9.2%)          | 38 (5.9%)         | 29 (4.4%)          | 123 (6.5%)              |
| <b>Month 6</b>                                                         |                   |                    |                   |                    |                         |
| Patients with known loop diuretic status at Month 6*                   | 251 (98.0%)       | 257 (98.8%)        | 512 (98.5%)       | 540 (98.5%)        | 1560 (98.5%)            |
| Prescribed <u>assigned</u> loop diuretic <sup>1</sup>                  | 196 (78.1%)       | 197 (76.7%)        | 428 (83.6%)       | 397 (73.5%)        | 1218 (78.1%)            |
| Total daily dose prescribed (furosemide equivalents) <sup>2</sup> , mg | 60.2 (70.3)       | 56.4 (40.5)        | 86.0 (88.0)       | 70.3 (56.1)        | 72.1 (70.2)             |
| Total daily dose prescribed (reported) <sup>2</sup> , mg               | 30.1 (35.1)       | 56.4 (40.5)        | 43.0 (44.0)       | 70.3 (56.1)        | 52.4 (49.0)             |
| Prescribed a different loop diuretic <sup>1</sup>                      | 19 (7.6%)         | 25 (9.7%)          | 61 (11.9%)        | 95 (17.6%)         | 200 (12.8%)             |
| Crossover (between arms) <sup>1</sup>                                  | 18 (7.2%)         | 16 (6.2%)          | 49 (9.6%)         | 61 (11.3%)         | 144 (9.2%)              |
| No loop diuretic currently prescribed <sup>1</sup>                     | 36 (14.3%)        | 35 (13.6%)         | 23 (4.5%)         | 48 (8.9%)          | 142 (9.1%)              |

| Timepoint                                                              | De Novo           |                    | WHF               |                    | All Patients<br>N=2,786 |
|------------------------------------------------------------------------|-------------------|--------------------|-------------------|--------------------|-------------------------|
|                                                                        | Torsemide (N=413) | Furosemide (N=403) | Torsemide (N=976) | Furosemide (N=994) |                         |
| <b>Month 12</b>                                                        |                   |                    |                   |                    |                         |
| Patients with known loop diuretic status at Month 12*                  | 219 (99.5%)       | 222 (99.6%)        | 416 / 423 (98.3%) | 415 (98.6%)        | 1272 (98.8%)            |
| Prescribed <u>assigned</u> loop diuretic <sup>1</sup>                  | 147 (67.1%)       | 169 (76.1%)        | 326 (78.4%)       | 288 (69.4%)        | 930 (73.1%)             |
| Total daily dose prescribed (furosemide equivalents) <sup>2</sup> , mg | 71.4 (113.1)      | 54.7 (41.6)        | 87.2 (83.8)       | 65.4 (47.4)        | 72.2 (74.4)             |
| Total daily dose prescribed (reported) <sup>2</sup> , mg               | 35.7 (56.6)       | 54.7 (41.6)        | 43.6 (41.9)       | 65.4 (47.4)        | 51.2 (47.1)             |
| Prescribed a different loop diuretic <sup>1</sup>                      | 20 (9.1%)         | 17 (7.7%)          | 61 (14.7%)        | 80 (19.3%)         | 178 (14.0%)             |
| Crossover (between arms) <sup>1</sup>                                  | 14 (6.4%)         | 11 (5.0%)          | 45 (10.8%)        | 56 (13.5%)         | 126 (9.9%)              |
| No loop diuretic currently prescribed <sup>1</sup>                     | 52 (23.7%)        | 36 (16.2%)         | 29 (7.0%)         | 47 (11.3%)         | 164 (12.9%)             |

Footnote: Denominators: \* = patients with available KCCQ-CSS data at the associated study visit; <sup>1</sup> = patients with a known loop diuretic status; <sup>2</sup> = data available for 2318, 1260, 892, 676 patients at Discharge, 1 month, 6 months, and 12 months, respectively.

eFigure 1: Unadjusted Kaplan-Meier curves for time to all-cause mortality comparing De novo and worsening HF for overall patients over 12 months

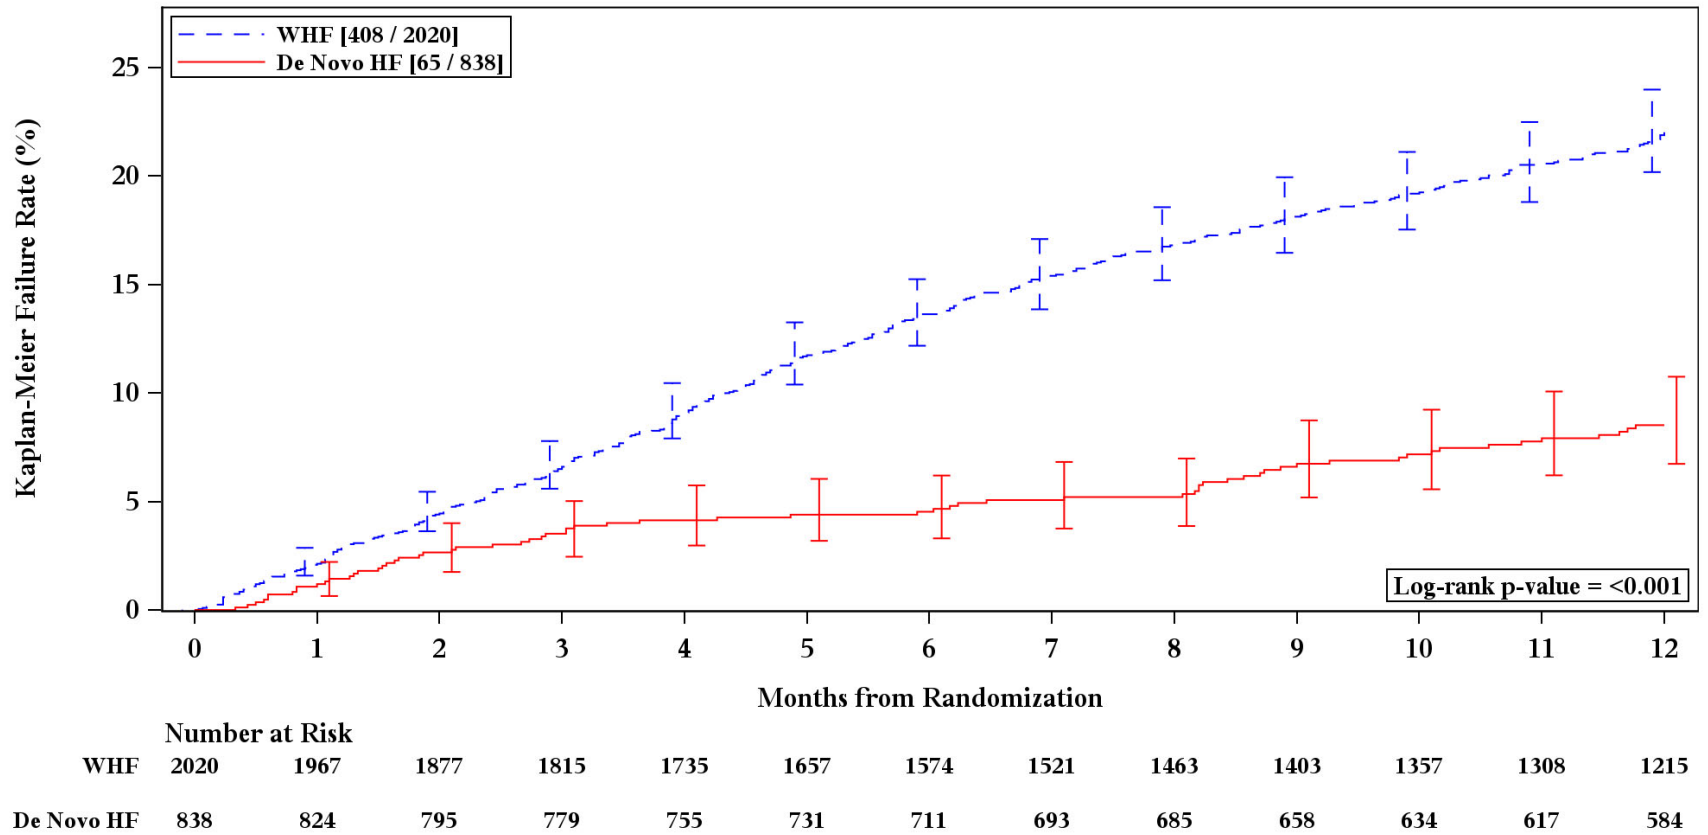

eFigure 2: Unadjusted Kaplan-Meier curves for time to all-cause mortality comparing De novo and WHF for patients with EF level  $\leq 40\%$  over 12 months

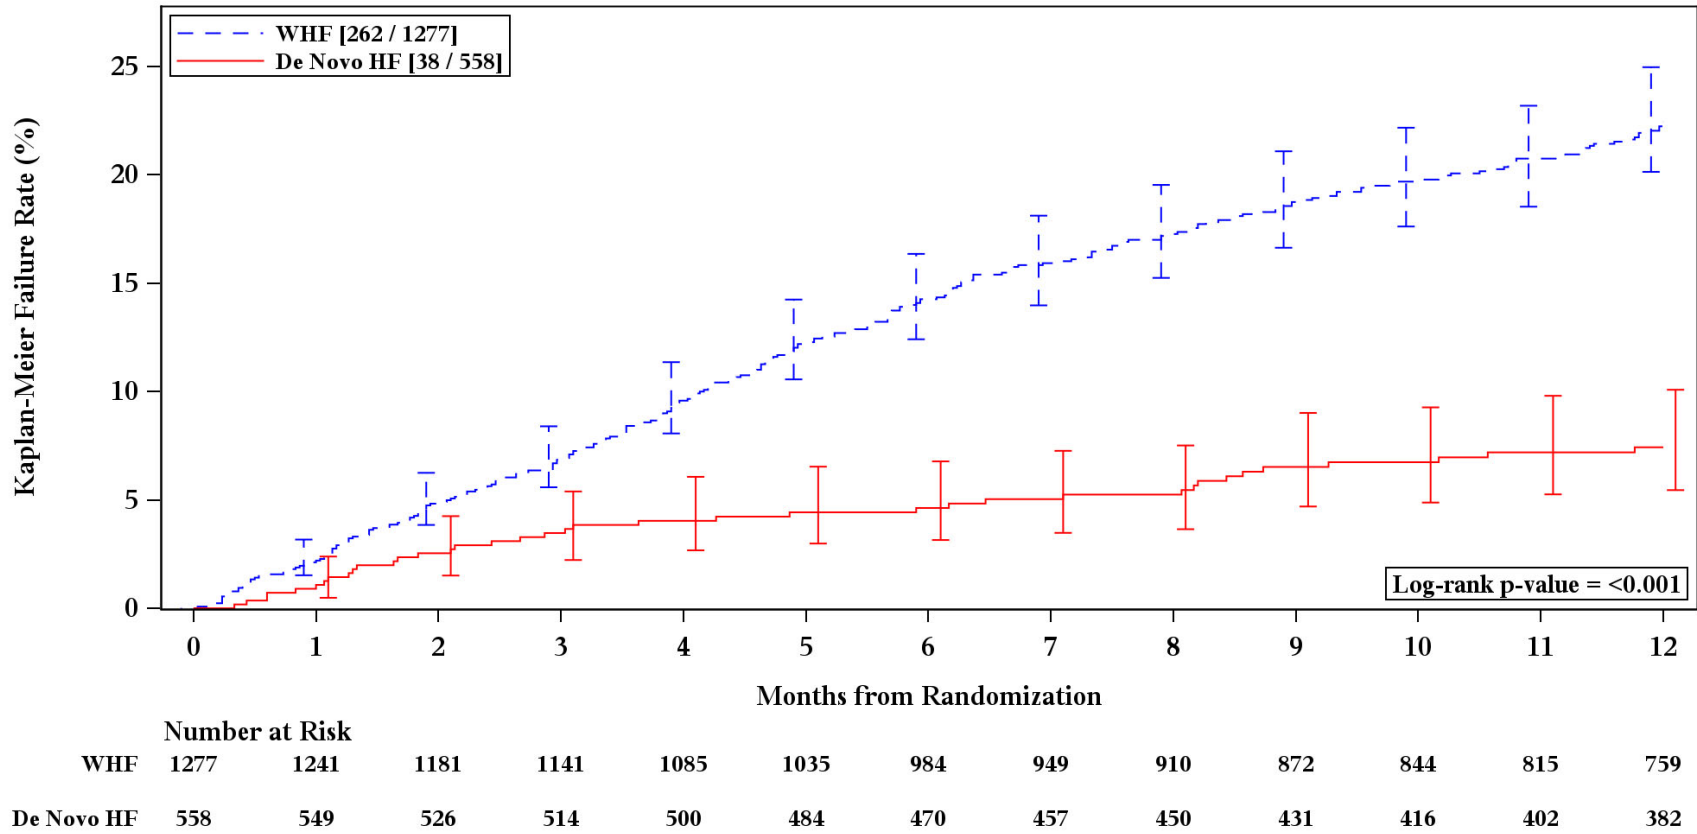

eFigure 3: Unadjusted Kaplan-Meier curves for time to all-cause mortality comparing De novo and WHF for patients with EF level >40% over 12 months

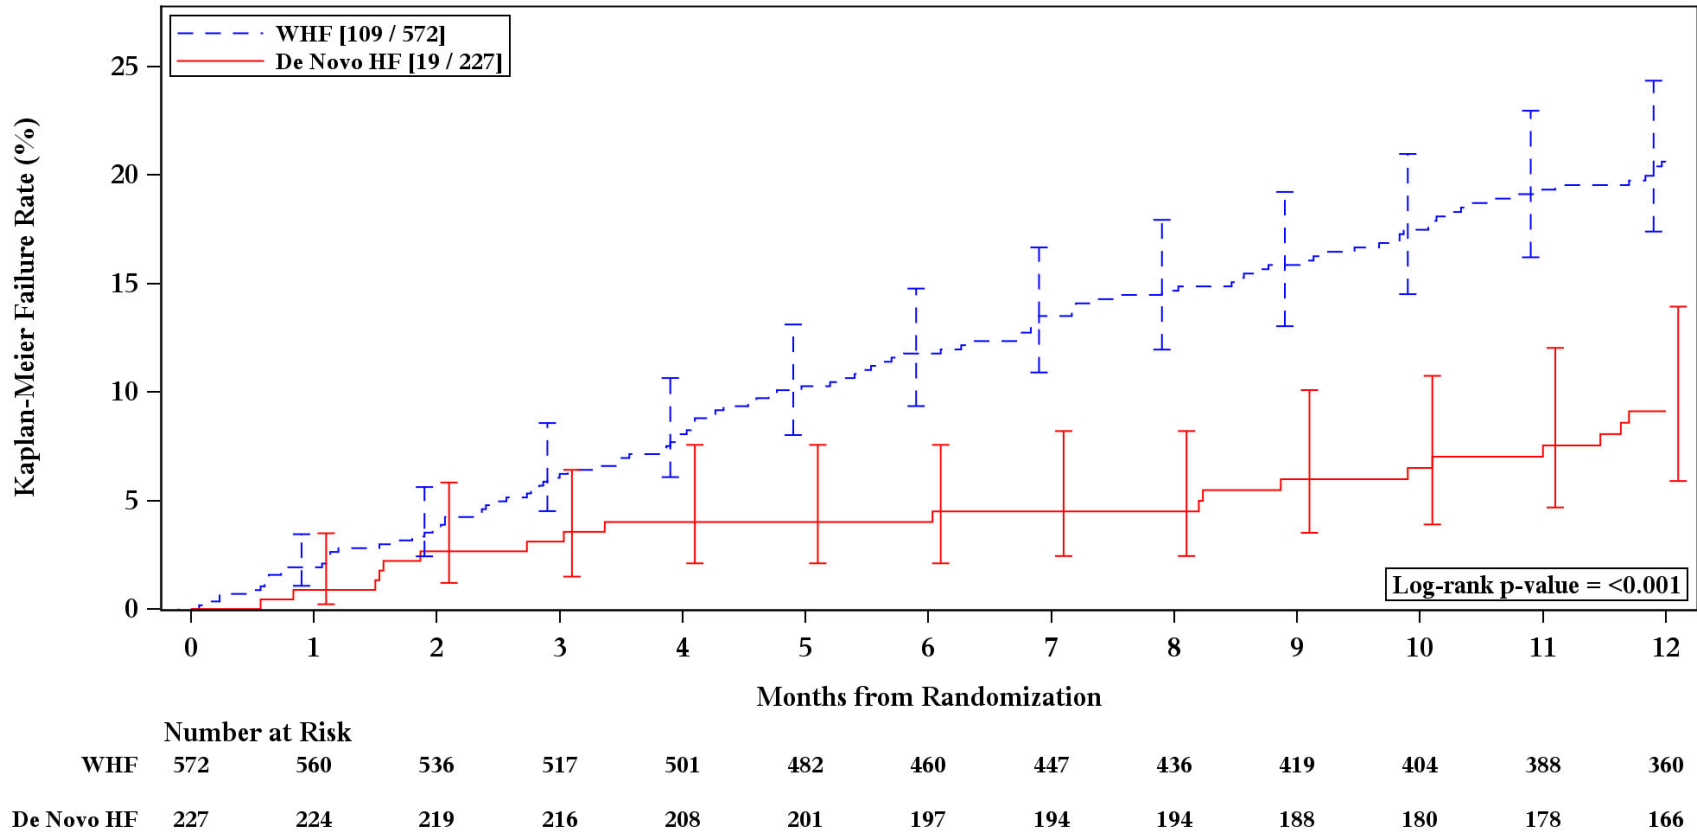

eFigure 4: Unadjusted cumulative incidence curves for all-cause hospitalization over 12 months comparing de novo and Worsening HF

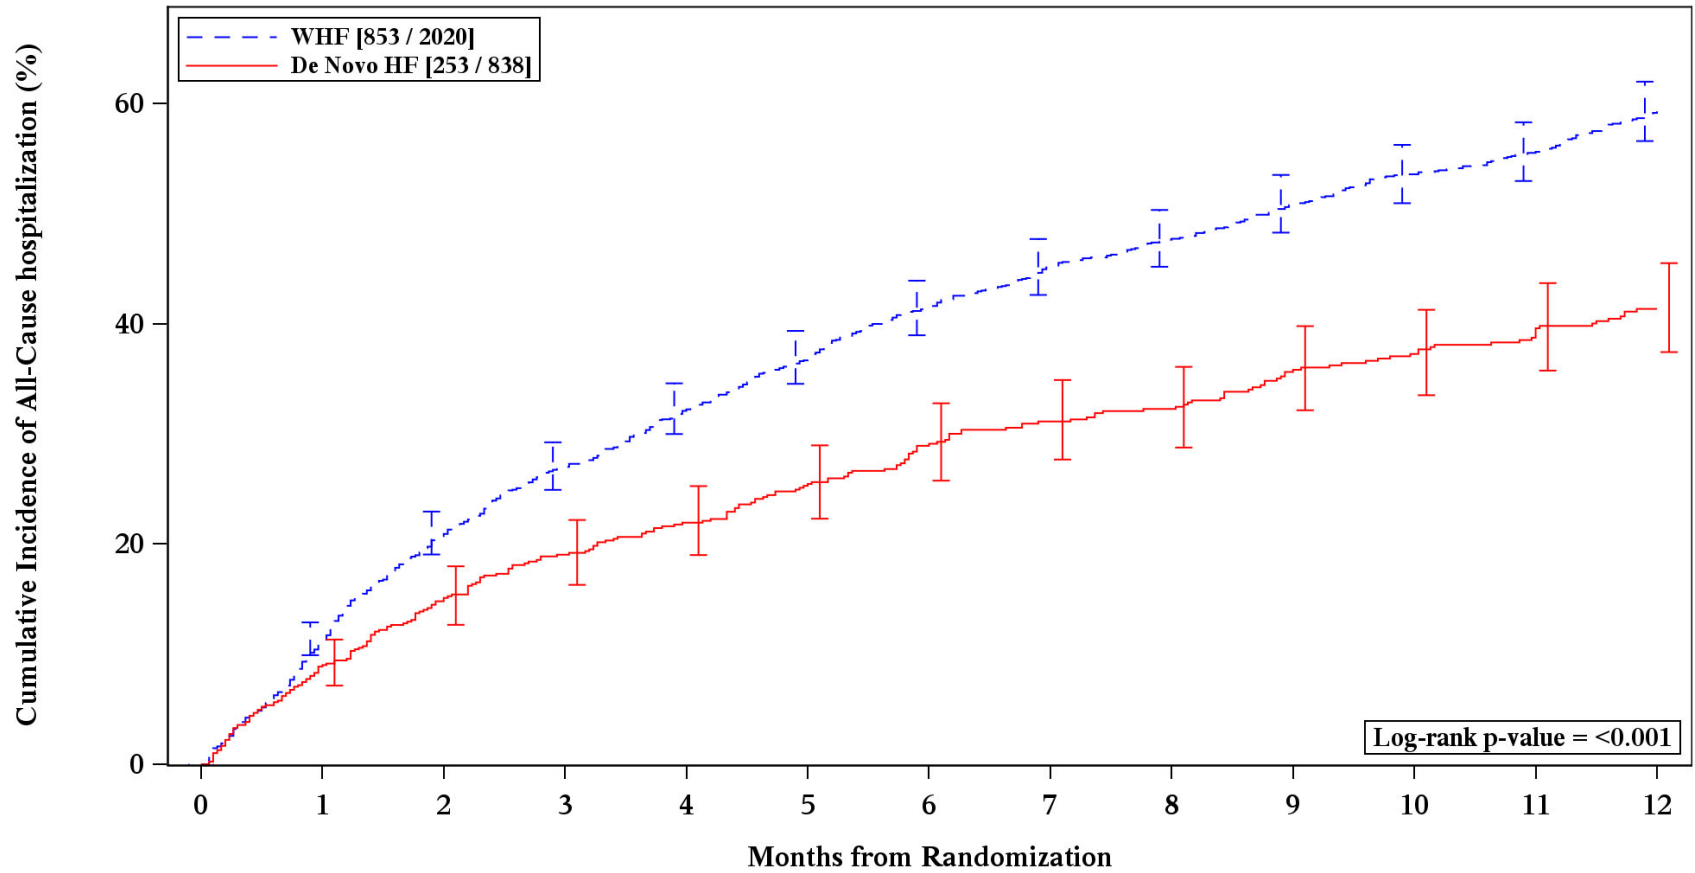

|            | Number at Risk |      |      |      |     |     |     |     |     |     |     |     |     |
|------------|----------------|------|------|------|-----|-----|-----|-----|-----|-----|-----|-----|-----|
|            | 0              | 1    | 2    | 3    | 4   | 5   | 6   | 7   | 8   | 9   | 10  | 11  | 12  |
| WHF        | 2020           | 1517 | 1221 | 1087 | 974 | 887 | 766 | 675 | 610 | 556 | 511 | 474 | 312 |
| De Novo HF | 838            | 649  | 548  | 508  | 474 | 441 | 398 | 366 | 349 | 322 | 300 | 286 | 192 |

Note: Patients who died were censored at time of death.

eFigure 5: Unadjusted cumulative incidence curves for all-cause hospitalization over 12 months comparing De novo and WHF for patients with EF level  $\leq 40\%$

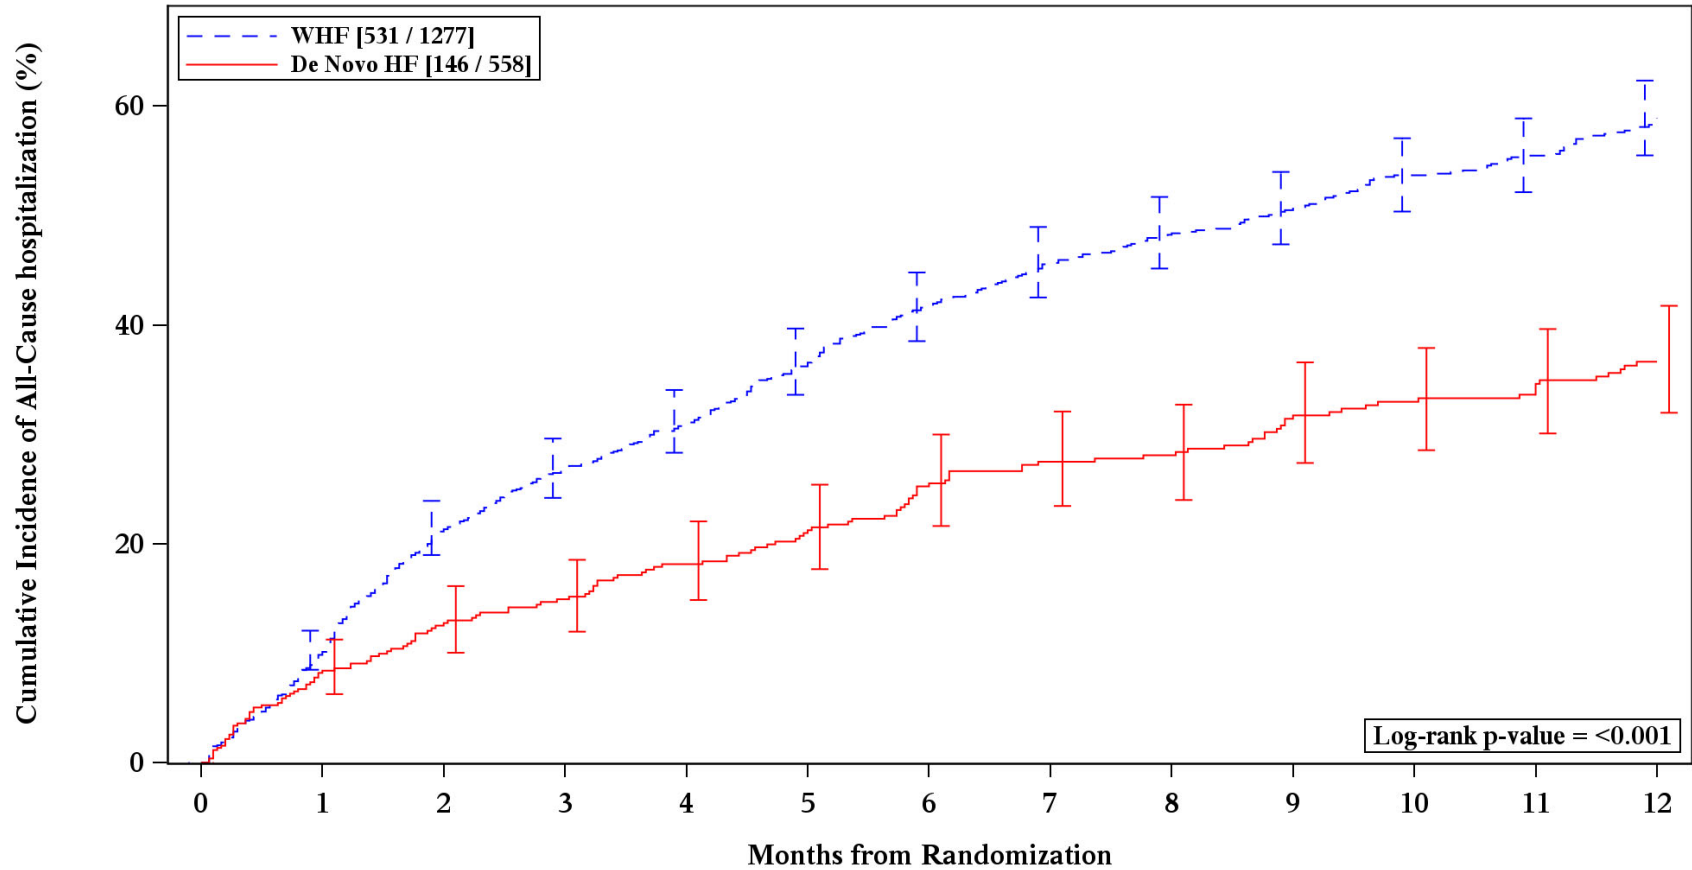

|            | Number at Risk |     |     |     |     |     |     |     |     |     |     |     |     |
|------------|----------------|-----|-----|-----|-----|-----|-----|-----|-----|-----|-----|-----|-----|
|            | 0              | 1   | 2   | 3   | 4   | 5   | 6   | 7   | 8   | 9   | 10  | 11  | 12  |
| WHF        | 1277           | 970 | 764 | 684 | 615 | 555 | 477 | 414 | 373 | 347 | 317 | 293 | 200 |
| De Novo HF | 558            | 435 | 368 | 347 | 322 | 303 | 272 | 251 | 241 | 224 | 210 | 201 | 144 |

Note: Patients who died were censored at time of death.

eFigure 6: Unadjusted cumulative incidence curves for all-cause hospitalization over 12 months comparing De novo and WHF for patients with EF level >40%

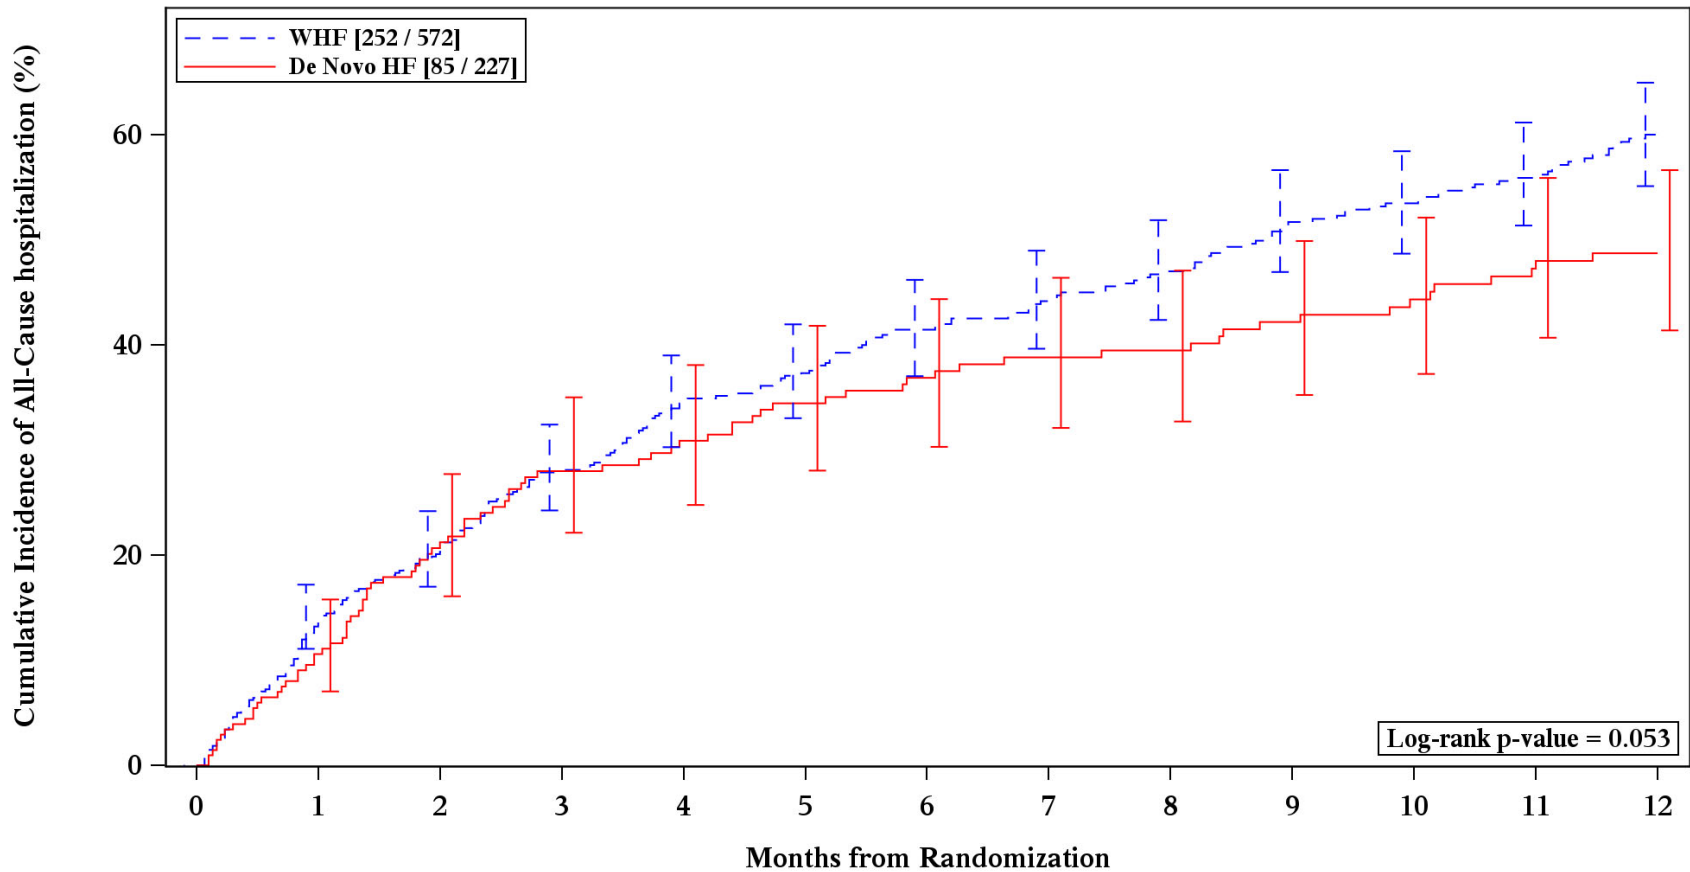

| Number at Risk |     | 0   | 1   | 2   | 3   | 4   | 5   | 6   | 7   | 8   | 9   | 10  | 11  | 12 |
|----------------|-----|-----|-----|-----|-----|-----|-----|-----|-----|-----|-----|-----|-----|----|
| WHF            | 572 | 421 | 356 | 310 | 277 | 259 | 224 | 202 | 185 | 163 | 155 | 144 | 144 | 92 |
| De Novo HF     | 227 | 174 | 142 | 127 | 118 | 109 | 101 | 93  | 90  | 84  | 76  | 72  | 72  | 43 |

Note: Patients who died were censored at time of death.



eFigure 7: Forest plot of HR/RR comparing randomized diuretic treatments (Torsemide vs Furosemide) for overall patients and patients for all endpoints among patient with EF level  $\leq 40\%$

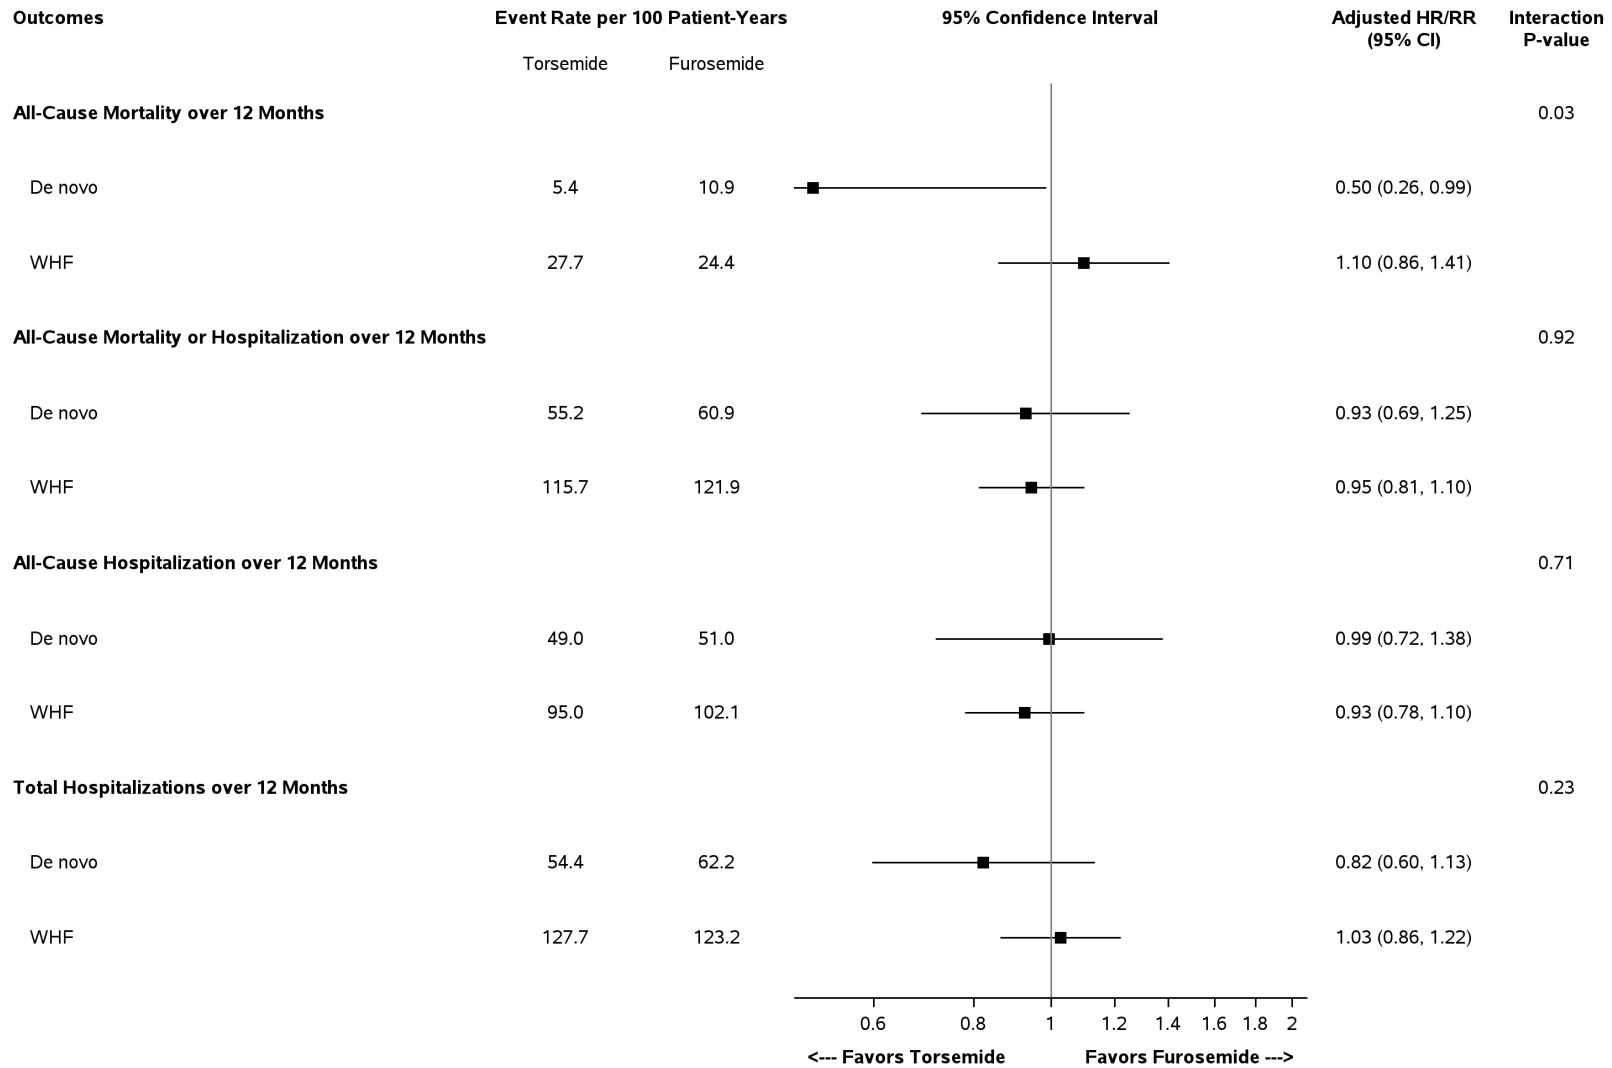

Note: First event rates per 100 patient-years are reported for all-cause mortality, all-cause mortality or hospitalization and all-cause hospitalization. For total hospitalizations, the total event rates per 100 patient-years are reported. HR=Hazard Ratio RR=Rate Ratio

eFigure 8: Forest plot of HR/RR comparing randomized diuretic treatments (Torsemide vs Furosemide) for overall patients and patients for all endpoints among patient with EF level >40%

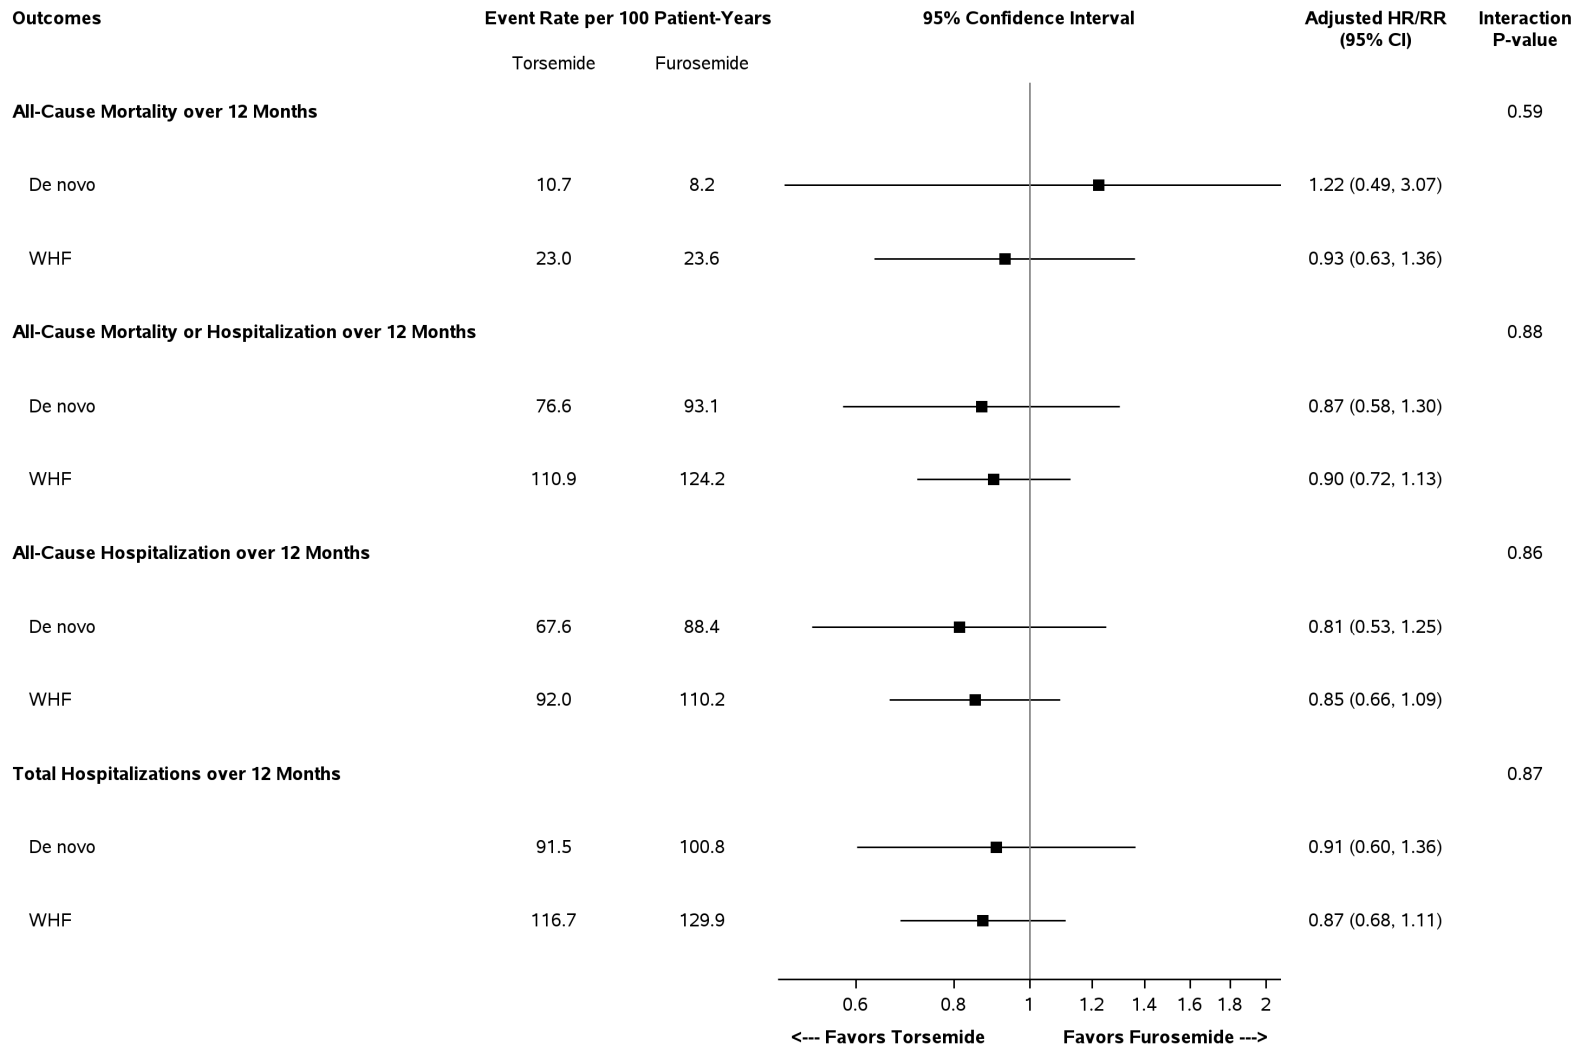

Note: First event rates per 100 patient-years are reported for all-cause mortality, all-cause mortality or hospitalization and all-cause hospitalization. For total hospitalizations, the total event rates per 100 patient-years are reported.  
 HR=Hazard Ratio RR=Rate Ratio
