# Supplementary material
Source: PubMed Central journal article supplement (PMC10644243)
Supplement: jamacardiol-e234776-s002.pdf [file jamacardiol-e234776-s002.pdf]

## **Data Sharing Statement**

Krim. Torsemide vs Furosemide Among Patients With New-Onset vs Worsening Chronic Heart Failure. *JAMA Cardiol.* Published November 13, 2023. doi:10.1001/jamacardio.2023.4776

### **Data**

**Data available:** No
